# Supplementary material for: Comprehensive assessment of measurement uncertainty in 13C-based metabolic flux experiments
Source: PubMed Central journal article supplement (PMC5937919; doi:10.1007/s00216-018-1017-7), 2018-04-13
Supplement: 216_2018_1017_MOESM1_ESM.pdf [file 216_2018_1017_MOESM1_ESM.pdf]

**Analytical and Bioanalytical Chemistry**

**Electronic Supplementary Material**

**Comprehensive assessment of measurement uncertainty in  $^{13}\text{C}$  based  
metabolic flux experiments**

Teresa Mairinger, Wolfhard Wegscheider, David Alejandro Peña, Matthias G. Steiger,  
Gunda Koellensperger, Jürgen Zanghellini, Stephan Hann

Additional files available under [10.1007/s00216-018-1017-7](https://doi.org/10.1007/s00216-018-1017-7)

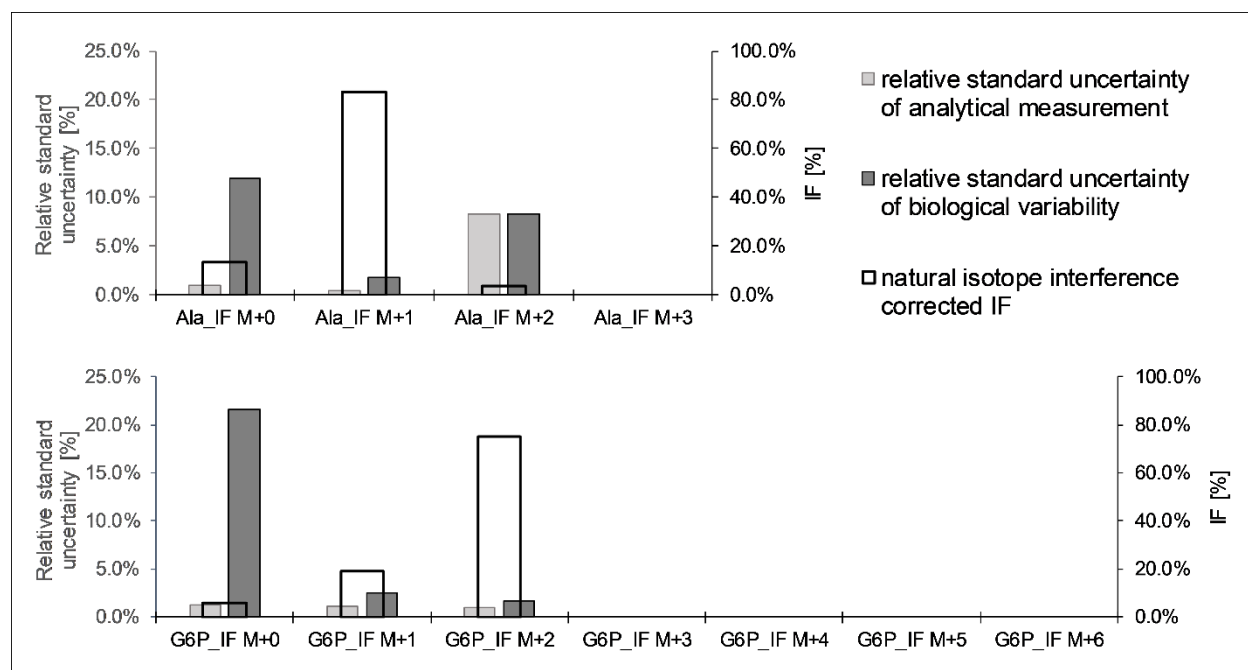

**Fig. S1** Exemplary comparison of relative standard uncertainties originating either from the analytical measurement procedure or from the biological variability from glucose-6-Phosphate (G6P) and alanine (Ala). Apart from others, biological variability can be explained by differences in terms homogeneity of the studied cell population, environmental factors as well as metabolite specific turnover rates, making optimal quenching and sampling conditions central. For assessing the biological variability, the following model equation was used:  $IF_{M+n_{corr}} * f_{bio}$  ( $f_{bio}$  = biological factor (distribution = normal,  $\bar{x}$  = 1,  $s$  = specific)). For this purpose, the standard deviation of three biological replicates was assessed, subsequently corrected for the analytical uncertainty and applied as the variation  $s$  for the biological factor. To illustrate the dependence on the isotopologue fraction (IF)

**Table S1** Equations for isotope interference correction of alanine (Ala) phosphoenolpyruvate (PEP), glyceraldehyde 3-phosphate (GAP), dihydroxyacetone phosphate (DHAP), 2-Phosphoglycerat (2PG), 3-Phosphoglycerat (3PG), erythrose-4-phosphate (E4P), ribulose-5-phosphate (R15P), ribose-5-phosphate (R5P), glucose-6-phosphate (G6P), fructose-6-phosphate (F6P) and seduheptulose-7-phosphate (S7P) are given

**Ala:** C<sub>3</sub>-backbone, to be corrected *sum formula*: C<sub>9</sub> Si<sub>2</sub>

| isotope inference corrected area of M+ n isotopologue | Equation for correction                                                                                                                                                                                                                                                                                                                                                                                                       |
|-------------------------------------------------------|-------------------------------------------------------------------------------------------------------------------------------------------------------------------------------------------------------------------------------------------------------------------------------------------------------------------------------------------------------------------------------------------------------------------------------|
| A <sub>0</sub>                                        | A <sub>0</sub>                                                                                                                                                                                                                                                                                                                                                                                                                |
| A <sub>1<sub>corr</sub></sub>                         | A <sub>1</sub> -(2b*A <sub>0</sub> )-(6c*A <sub>0</sub> )                                                                                                                                                                                                                                                                                                                                                                     |
| A <sub>2<sub>corr</sub></sub>                         | A <sub>2</sub> -(b <sup>2</sup> *A <sub>0</sub> )-(2a*A <sub>0</sub> )-(2b*A <sub>1<sub>corr</sub></sub> )-((6c*2b)*A <sub>0</sub> )-(6c*A <sub>1<sub>corr</sub></sub> )-(15c <sup>2</sup> *A <sub>0</sub> )                                                                                                                                                                                                                  |
| A <sub>3<sub>corr</sub></sub>                         | A <sub>3</sub> -(b <sup>2</sup> *A <sub>1<sub>corr</sub></sub> )-(2ab*A <sub>0</sub> )-(2a*A <sub>1<sub>corr</sub></sub> )-(2b*A <sub>2</sub> )-((6c*b <sup>2</sup> )*A <sub>0</sub> )-((6c*2a)*A <sub>0</sub> )-((6c*2b)*A <sub>1<sub>corr</sub></sub> )-(6c*A <sub>2<sub>corr</sub></sub> )-((15c <sup>2</sup> *2b)*A <sub>0</sub> )-(15c <sup>2</sup> *A <sub>1<sub>corr</sub></sub> )-(20c <sup>3</sup> *A <sub>0</sub> ) |

**PEP:** C<sub>3</sub>-backbone, to be corrected *sum formula*: C<sub>12</sub> Si<sub>3</sub>

| isotope inference corrected area of M+ n isotopologue | Equation for correction                                                                                                                                                                                                                                                                                                                                                                                                                                                          |
|-------------------------------------------------------|----------------------------------------------------------------------------------------------------------------------------------------------------------------------------------------------------------------------------------------------------------------------------------------------------------------------------------------------------------------------------------------------------------------------------------------------------------------------------------|
| A <sub>0</sub>                                        | A <sub>0</sub>                                                                                                                                                                                                                                                                                                                                                                                                                                                                   |
| A <sub>1<sub>corr</sub></sub>                         | A <sub>1</sub> -(3b*A <sub>0</sub> )-(9c*A <sub>0</sub> )                                                                                                                                                                                                                                                                                                                                                                                                                        |
| A <sub>2<sub>corr</sub></sub>                         | A <sub>2</sub> -(3b <sup>2</sup> *A <sub>0</sub> )-(3a*A <sub>0</sub> )-(3b*A <sub>1<sub>corr</sub></sub> )-((9c*3b)*A <sub>0</sub> )-(9c*A <sub>1<sub>corr</sub></sub> )-(36c <sup>2</sup> *A <sub>0</sub> )                                                                                                                                                                                                                                                                    |
| A <sub>3<sub>corr</sub></sub>                         | A <sub>3</sub> -(b <sup>3</sup> *A <sub>0</sub> )-(6ab*A <sub>0</sub> )-(3b <sup>2</sup> *A <sub>1<sub>corr</sub></sub> )-(3a*A <sub>1<sub>corr</sub></sub> )-(3b*A <sub>2<sub>corr</sub></sub> )-((9c*3b <sup>2</sup> )*A <sub>0</sub> )-((9c*3a)*A <sub>0</sub> )-((9c*3b)*A <sub>1<sub>corr</sub></sub> )-(9c*A <sub>2<sub>corr</sub></sub> )-((36c <sup>2</sup> *3b)*A <sub>0</sub> )-(36c <sup>2</sup> *A <sub>1<sub>corr</sub></sub> )-(84c <sup>3</sup> *A <sub>0</sub> ) |

**GAP/DHAP:** C<sub>3</sub>-backbone, to be corrected *sum formula* C<sub>14</sub> Si<sub>3</sub>

| isotope inference corrected area of M+ n isotopologue | Equation for correction                                                                                                                                                                                                                                                                                                                                                                                                                                                               |
|-------------------------------------------------------|---------------------------------------------------------------------------------------------------------------------------------------------------------------------------------------------------------------------------------------------------------------------------------------------------------------------------------------------------------------------------------------------------------------------------------------------------------------------------------------|
| A <sub>0</sub>                                        | A <sub>0</sub>                                                                                                                                                                                                                                                                                                                                                                                                                                                                        |
| A <sub>1<sub>corr</sub></sub>                         | A <sub>1</sub> -(3b*A <sub>0</sub> )-(11c*A <sub>0</sub> )                                                                                                                                                                                                                                                                                                                                                                                                                            |
| A <sub>2<sub>corr</sub></sub>                         | A <sub>2</sub> -(3b <sup>2</sup> *A <sub>0</sub> )-(3a*A <sub>0</sub> )-(3b*A <sub>1<sub>corr</sub></sub> )-((11c*3b)*A <sub>0</sub> )-(11c*A <sub>1<sub>corr</sub></sub> )-(55c <sup>2</sup> *A <sub>0</sub> )                                                                                                                                                                                                                                                                       |
| A <sub>3<sub>corr</sub></sub>                         | A <sub>3</sub> -(b <sup>3</sup> *A <sub>0</sub> )-(6ab*A <sub>0</sub> )-(3b <sup>2</sup> *A <sub>1<sub>corr</sub></sub> )-(3a*A <sub>1<sub>corr</sub></sub> )-(3b*A <sub>2<sub>corr</sub></sub> )-((11c*3b <sup>2</sup> )*A <sub>0</sub> )-((11c*3a)*A <sub>0</sub> )-((11c*3b)*A <sub>1<sub>corr</sub></sub> )-(11c*A <sub>2<sub>corr</sub></sub> )-((55c <sup>2</sup> *3b)*A <sub>0</sub> )-(55c <sup>2</sup> *A <sub>1<sub>corr</sub></sub> )-(165c <sup>3</sup> *A <sub>0</sub> ) |

**2PG/3PG:** C<sub>3</sub>-backbone, to be corrected *sum formula*: C<sub>15</sub> Si<sub>4</sub>

| isotope inference corrected area of M+ n isotopologue | Equation for correction                                                                                                                                                                                                                                                                                                                                                                                                                                                               |
|-------------------------------------------------------|---------------------------------------------------------------------------------------------------------------------------------------------------------------------------------------------------------------------------------------------------------------------------------------------------------------------------------------------------------------------------------------------------------------------------------------------------------------------------------------|
| A <sub>0</sub>                                        | A <sub>0</sub>                                                                                                                                                                                                                                                                                                                                                                                                                                                                        |
| A <sub>1<sub>corr</sub></sub>                         | A <sub>1</sub> -(4b*A <sub>0</sub> )-(12c*A <sub>0</sub> )                                                                                                                                                                                                                                                                                                                                                                                                                            |
| A <sub>2<sub>corr</sub></sub>                         | A <sub>2</sub> -(4a*A <sub>0</sub> )-(6b <sup>2</sup> *A <sub>0</sub> )-(4b*A <sub>1<sub>corr</sub></sub> )-((12c*4b)*A <sub>0</sub> )-(12c*A <sub>1<sub>corr</sub></sub> )-(66c <sup>2</sup> *A <sub>0</sub> )                                                                                                                                                                                                                                                                       |
| A <sub>3<sub>corr</sub></sub>                         | A <sub>3</sub> -(12ab*A <sub>0</sub> )-(4a*A <sub>1<sub>corr</sub></sub> )-(4b <sup>3</sup> *A <sub>0</sub> )-(6b <sup>2</sup> *A <sub>1<sub>corr</sub></sub> )-(4b*A <sub>2<sub>corr</sub></sub> )-((12c*4a)*A <sub>0</sub> )-((12c*6b <sup>2</sup> )*A <sub>0</sub> )-((12c*4b)*A <sub>1<sub>corr</sub></sub> )-(12c*A <sub>2<sub>corr</sub></sub> )-(66c <sup>2</sup> *4b)*A <sub>0</sub> -(66c <sup>2</sup> *A <sub>1<sub>corr</sub></sub> )-(220c <sup>3</sup> *A <sub>0</sub> ) |

**E4P:** C<sub>4</sub>-backbone, to be corrected *sum formula*: C<sub>17</sub> Si<sub>4</sub>

| isotope inference corrected area of M+ n isotopologue | Equation for correction                                                                                                                                                                                                                                                                                                                                                                                                                                                                                                                                                                                                                                                                                                                                                                                                                                                                                                                           |
|-------------------------------------------------------|---------------------------------------------------------------------------------------------------------------------------------------------------------------------------------------------------------------------------------------------------------------------------------------------------------------------------------------------------------------------------------------------------------------------------------------------------------------------------------------------------------------------------------------------------------------------------------------------------------------------------------------------------------------------------------------------------------------------------------------------------------------------------------------------------------------------------------------------------------------------------------------------------------------------------------------------------|
| A <sub>0</sub>                                        | A <sub>0</sub>                                                                                                                                                                                                                                                                                                                                                                                                                                                                                                                                                                                                                                                                                                                                                                                                                                                                                                                                    |
| A <sub>1<sub>corr</sub></sub>                         | A <sub>1</sub> -(4b*A <sub>0</sub> )-(13c*A <sub>0</sub> )                                                                                                                                                                                                                                                                                                                                                                                                                                                                                                                                                                                                                                                                                                                                                                                                                                                                                        |
| A <sub>2<sub>corr</sub></sub>                         | A <sub>2</sub> -(4a*A <sub>0</sub> )-(6b <sup>2</sup> *A <sub>0</sub> )-(4b*A <sub>1<sub>corr</sub></sub> )-((13c*4b)*A <sub>0</sub> )-(13c*A <sub>1<sub>corr</sub></sub> )-(78c <sup>2</sup> *A <sub>0</sub> )                                                                                                                                                                                                                                                                                                                                                                                                                                                                                                                                                                                                                                                                                                                                   |
| A <sub>3<sub>corr</sub></sub>                         | A <sub>3</sub> -(12ab*A <sub>0</sub> )-(4a*A <sub>1<sub>corr</sub></sub> )-(4b <sup>3</sup> *A <sub>0</sub> )-(6b <sup>2</sup> *A <sub>1<sub>corr</sub></sub> )-(4b*A <sub>2<sub>corr</sub></sub> )-((13c*4a)*A <sub>0</sub> )-((13c*6b <sup>2</sup> )*A <sub>0</sub> )-((13c*4b)*A <sub>1<sub>corr</sub></sub> )-(13c*A <sub>2<sub>corr</sub></sub> )-((78c <sup>2</sup> *4b)*A <sub>0</sub> )-(78c <sup>2</sup> *A <sub>1<sub>corr</sub></sub> )-(286c <sup>3</sup> *A <sub>0</sub> )                                                                                                                                                                                                                                                                                                                                                                                                                                                           |
| A <sub>4<sub>corr</sub></sub>                         | A <sub>4</sub> -(b <sup>4</sup> *A <sub>0</sub> )-(12ab*A <sub>1<sub>corr</sub></sub> )-(12ab <sup>2</sup> *A <sub>0</sub> )-(6a <sup>2</sup> *A <sub>0</sub> )-(4a*A <sub>2<sub>corr</sub></sub> )-(4b <sup>3</sup> *A <sub>1<sub>corr</sub></sub> )-(6b <sup>2</sup> *A <sub>2<sub>corr</sub></sub> )-(4b-A <sub>3<sub>corr</sub></sub> )-((13c*12ab)*A <sub>0</sub> )-((13c*4a)*A <sub>1<sub>corr</sub></sub> )-((13c*4b <sup>3</sup> )*A <sub>0</sub> )-((13c*6b <sup>2</sup> )*A <sub>1<sub>corr</sub></sub> )-((13c*4b)*A <sub>2<sub>corr</sub></sub> )-((13c*A <sub>3<sub>corr</sub></sub> )-((78c <sup>2</sup> *4a)*A <sub>0</sub> )-((78c <sup>2</sup> *6b <sup>2</sup> )*A <sub>0</sub> )-((78c <sup>2</sup> *4b)*A <sub>1<sub>corr</sub></sub> )-(78c <sup>2</sup> *A <sub>2<sub>corr</sub></sub> )-((286c <sup>3</sup> *4b)*A <sub>0</sub> )-(286c <sup>3</sup> *A <sub>1<sub>corr</sub></sub> )-(715c <sup>4</sup> *A <sub>0</sub> ) |

**R5P/RI5P:** C<sub>5</sub>-backbone, to be corrected *sum formula*: C<sub>21</sub> Si<sub>5</sub>

| isotope inference corrected area of M+ <i>n</i> isotopologue | Equation for correction                                                                                                                                                                                                                                                                                                                                                                                                                                                                                                                                                                                                                                                                                                                                                                                                                                                                                                                                                                                                                                                                                                                                                                         |
|--------------------------------------------------------------|-------------------------------------------------------------------------------------------------------------------------------------------------------------------------------------------------------------------------------------------------------------------------------------------------------------------------------------------------------------------------------------------------------------------------------------------------------------------------------------------------------------------------------------------------------------------------------------------------------------------------------------------------------------------------------------------------------------------------------------------------------------------------------------------------------------------------------------------------------------------------------------------------------------------------------------------------------------------------------------------------------------------------------------------------------------------------------------------------------------------------------------------------------------------------------------------------|
| $A_0$                                                        | $A_0$                                                                                                                                                                                                                                                                                                                                                                                                                                                                                                                                                                                                                                                                                                                                                                                                                                                                                                                                                                                                                                                                                                                                                                                           |
| $A_{1\text{corr}}$                                           | $A_1 - (5b \cdot A_0) - (16c \cdot A_0)$                                                                                                                                                                                                                                                                                                                                                                                                                                                                                                                                                                                                                                                                                                                                                                                                                                                                                                                                                                                                                                                                                                                                                        |
| $A_{2\text{corr}}$                                           | $A_2 - (5a \cdot A_0) - (10b^2 \cdot A_0) - (5b \cdot A_{1\text{corr}}) - ((16c \cdot 5b) \cdot A_0) - (16c \cdot A_{1\text{corr}}) - (120c^2 \cdot A_0)$                                                                                                                                                                                                                                                                                                                                                                                                                                                                                                                                                                                                                                                                                                                                                                                                                                                                                                                                                                                                                                       |
| $A_{3\text{corr}}$                                           | $A_3 - (20ab \cdot A_0) - (5a \cdot A_{1\text{corr}}) - (10b^3 \cdot A_0) - (10b^2 \cdot A_{1\text{corr}}) - (5b \cdot A_{2\text{corr}}) - ((16c \cdot 5a) \cdot A_0) - ((16c \cdot 10b^2) \cdot A_0) - ((16c \cdot 5b) \cdot A_{1\text{corr}}) - (16c \cdot A_{2\text{corr}}) - ((120c^2 \cdot 5b) \cdot A_0) - (120c^2 \cdot A_{1\text{corr}}) - (560c^3 \cdot A_0)$                                                                                                                                                                                                                                                                                                                                                                                                                                                                                                                                                                                                                                                                                                                                                                                                                          |
| $A_{4\text{corr}}$                                           | $A_4 - (20ab \cdot A_{1\text{corr}}) - (30ab^2 \cdot A_0) - (10a^2 \cdot A_0) - (5a \cdot A_{2\text{corr}}) - (5b^4 \cdot A_0) - (10b^3 \cdot A_{1\text{corr}}) - (10b^2 \cdot A_{2\text{corr}}) - (5b \cdot A_{3\text{corr}}) - ((16c \cdot 20ab) \cdot A_0) - ((16c \cdot 5a) \cdot A_{1\text{corr}}) - ((16c \cdot 10b^3) \cdot A_0) - ((16c \cdot 10b^2) \cdot A_{1\text{corr}}) - ((16c \cdot 5b) \cdot A_{2\text{corr}}) - (16c \cdot A_{3\text{corr}}) - ((120c^2 \cdot 5a) \cdot A_0) - (120c^2 \cdot 10b^2) \cdot A_0 - ((120c^2 \cdot 5b) \cdot A_{1\text{corr}}) - (120c^2 \cdot A_{2\text{corr}}) - ((560c^3 \cdot 5b) \cdot A_0) - (560c^3 \cdot A_{1\text{corr}}) - (1820c^4 \cdot A_0)$                                                                                                                                                                                                                                                                                                                                                                                                                                                                                          |
| $A_{5\text{corr}}$                                           | $A_5 - (b^5 \cdot A_0) - (30a^2 \cdot b \cdot A_0) - (20ab \cdot A_{2\text{corr}}) - (20ab^3 \cdot A_0) - (30ab^2 \cdot A_{1\text{corr}}) - (10a^2 \cdot A_{1\text{corr}}) - (5a \cdot A_{3\text{corr}}) - (5b^4 \cdot A_{1\text{corr}}) - (10b^3 \cdot A_{2\text{corr}}) - (10b^2 \cdot A_{3\text{corr}}) - (5b \cdot A_{4\text{corr}}) - ((16c \cdot 20ab) \cdot A_{1\text{corr}}) - ((16c \cdot 30ab^2) \cdot A_0) - ((16c \cdot 10a^2) \cdot A_0) - ((16c \cdot 5a) \cdot A_{2\text{corr}}) - ((16c \cdot 5b^4) \cdot A_0) - ((16c \cdot 10b^3) \cdot A_{1\text{corr}}) - ((16c \cdot 10b^2) \cdot A_{2\text{corr}}) - ((16c \cdot 5b) \cdot A_{3\text{corr}}) - (16c \cdot A_{4\text{corr}}) - ((120c^2 \cdot 20ab) \cdot A_0) - ((120c^2 \cdot 5a) \cdot A_{1\text{corr}}) - ((120c^2 \cdot 10b^3) \cdot A_0) - ((120c^2 \cdot 10b^2) \cdot A_{1\text{corr}}) - ((120c^2 \cdot 5b) \cdot A_{2\text{corr}}) - (120c^2 \cdot A_{3\text{corr}}) - ((560c^3 \cdot 5a) \cdot A_0) - ((560c^3 \cdot 10b^2) \cdot A_0) - ((560c^3 \cdot 5b) \cdot A_{1\text{corr}}) - (560c^3 \cdot A_{2\text{corr}}) - ((1820c^4 \cdot 5b) \cdot A_0) - (1820c^4 \cdot A_{1\text{corr}}) - (4368c^5 \cdot A_0)$ |

**F6P/G6P:** C<sub>6</sub>-backbone, to be corrected *sum formula*: C<sub>25</sub> Si<sub>6</sub>

| isotope inference corrected area of M+ n isotopologue | Equation for correction                                                                                                                                                                                                                                                                                                                                                                                                                                                                                                                                                                                                                                                                                                                                                                                                                                                                                                                                                                                                                                                                                                                                                                                                                                                                                                                                                                                                                                                                                                                                                                                                                                                                                                                                                                                                                                                                                                                                                                                                                                                                                                                                                                                                                                                                                                                                                                                                                                                                                                                                                                             |
|-------------------------------------------------------|-----------------------------------------------------------------------------------------------------------------------------------------------------------------------------------------------------------------------------------------------------------------------------------------------------------------------------------------------------------------------------------------------------------------------------------------------------------------------------------------------------------------------------------------------------------------------------------------------------------------------------------------------------------------------------------------------------------------------------------------------------------------------------------------------------------------------------------------------------------------------------------------------------------------------------------------------------------------------------------------------------------------------------------------------------------------------------------------------------------------------------------------------------------------------------------------------------------------------------------------------------------------------------------------------------------------------------------------------------------------------------------------------------------------------------------------------------------------------------------------------------------------------------------------------------------------------------------------------------------------------------------------------------------------------------------------------------------------------------------------------------------------------------------------------------------------------------------------------------------------------------------------------------------------------------------------------------------------------------------------------------------------------------------------------------------------------------------------------------------------------------------------------------------------------------------------------------------------------------------------------------------------------------------------------------------------------------------------------------------------------------------------------------------------------------------------------------------------------------------------------------------------------------------------------------------------------------------------------------|
| A <sub>0</sub>                                        | A <sub>0</sub>                                                                                                                                                                                                                                                                                                                                                                                                                                                                                                                                                                                                                                                                                                                                                                                                                                                                                                                                                                                                                                                                                                                                                                                                                                                                                                                                                                                                                                                                                                                                                                                                                                                                                                                                                                                                                                                                                                                                                                                                                                                                                                                                                                                                                                                                                                                                                                                                                                                                                                                                                                                      |
| A <sub>1<sub>corr</sub></sub>                         | A <sub>1</sub> -(6b*A <sub>0</sub> )-(19c*A <sub>0</sub> )                                                                                                                                                                                                                                                                                                                                                                                                                                                                                                                                                                                                                                                                                                                                                                                                                                                                                                                                                                                                                                                                                                                                                                                                                                                                                                                                                                                                                                                                                                                                                                                                                                                                                                                                                                                                                                                                                                                                                                                                                                                                                                                                                                                                                                                                                                                                                                                                                                                                                                                                          |
| A <sub>2<sub>corr</sub></sub>                         | A <sub>2</sub> -(6a*A <sub>0</sub> )-(15b <sup>2</sup> *A <sub>0</sub> )-(6b*A <sub>1<sub>corr</sub></sub> )-((19c*6b)*A <sub>0</sub> )-(19c*A <sub>1<sub>corr</sub></sub> )-(171c <sup>2</sup> *A <sub>0</sub> )                                                                                                                                                                                                                                                                                                                                                                                                                                                                                                                                                                                                                                                                                                                                                                                                                                                                                                                                                                                                                                                                                                                                                                                                                                                                                                                                                                                                                                                                                                                                                                                                                                                                                                                                                                                                                                                                                                                                                                                                                                                                                                                                                                                                                                                                                                                                                                                   |
| A <sub>3<sub>corr</sub></sub>                         | A <sub>3</sub> -(30ab*A <sub>0</sub> )-(6a*A <sub>1<sub>corr</sub></sub> )-(20b <sup>3</sup> *A <sub>0</sub> )-(15b <sup>2</sup> *A <sub>1<sub>corr</sub></sub> )-(6b*A <sub>2<sub>corr</sub></sub> )-((19c*6a)*A <sub>0</sub> )-((19c*15b <sup>2</sup> )*A <sub>0</sub> )-((19c*6b)*A <sub>1<sub>corr</sub></sub> )-(19c*A <sub>2<sub>corr</sub></sub> )-((6b*171c <sup>2</sup> )*A <sub>0</sub> )-(171c <sup>2</sup> *A <sub>1<sub>corr</sub></sub> )*(969c <sup>3</sup> *A <sub>0</sub> )                                                                                                                                                                                                                                                                                                                                                                                                                                                                                                                                                                                                                                                                                                                                                                                                                                                                                                                                                                                                                                                                                                                                                                                                                                                                                                                                                                                                                                                                                                                                                                                                                                                                                                                                                                                                                                                                                                                                                                                                                                                                                                        |
| A <sub>4<sub>corr</sub></sub>                         | A <sub>4</sub> -(30ab*A <sub>1<sub>corr</sub></sub> )-(60ab <sup>2</sup> *A <sub>0</sub> )-(15a <sup>2</sup> *A <sub>0</sub> )-(6a*A <sub>2<sub>corr</sub></sub> )-(15b <sup>4</sup> *A <sub>0</sub> )-(20b <sup>3</sup> *A <sub>1<sub>corr</sub></sub> )-(15b <sup>2</sup> *A <sub>2<sub>corr</sub></sub> )-(6b*A <sub>3<sub>corr</sub></sub> )-((19c*30ab)*A <sub>0</sub> )-((19c*6a)*A <sub>1<sub>corr</sub></sub> )-((19c*20b <sup>3</sup> )*A <sub>0</sub> )-((19c*15b <sup>2</sup> )*A <sub>1<sub>corr</sub></sub> )-((19c*6b)*A <sub>2<sub>corr</sub></sub> )-(19c*A <sub>3<sub>corr</sub></sub> )-((171c <sup>2</sup> *6a)*A <sub>0</sub> )-((171c <sup>2</sup> *15b <sup>2</sup> )*A <sub>0</sub> )-((171c <sup>2</sup> *6b)*A <sub>1<sub>corr</sub></sub> )-(171c <sup>2</sup> *A <sub>2<sub>corr</sub></sub> )-((969c <sup>3</sup> *6b)*A <sub>0</sub> )-(969c <sup>3</sup> *A <sub>1<sub>corr</sub></sub> )-(3876c <sup>4</sup> *A <sub>0</sub> )                                                                                                                                                                                                                                                                                                                                                                                                                                                                                                                                                                                                                                                                                                                                                                                                                                                                                                                                                                                                                                                                                                                                                                                                                                                                                                                                                                                                                                                                                                                                                                                                                                       |
| A <sub>5<sub>corr</sub></sub>                         | A <sub>5</sub> -(60a <sup>2</sup> b*A <sub>0</sub> )-(30ab*A <sub>2<sub>corr</sub></sub> )-(60ab <sup>3</sup> *A <sub>0</sub> )-(60ab <sup>2</sup> *A <sub>1<sub>corr</sub></sub> )-(15a <sup>2</sup> *A <sub>1<sub>corr</sub></sub> )-(6a*A <sub>3<sub>corr</sub></sub> )-(6b <sup>5</sup> *A <sub>0</sub> )-(15b <sup>4</sup> *A <sub>1<sub>corr</sub></sub> )-(20b <sup>3</sup> *A <sub>2<sub>corr</sub></sub> )-(15b <sup>2</sup> *A <sub>3<sub>corr</sub></sub> )-(6b*A <sub>4<sub>corr</sub></sub> )-((19c*30ab)*A <sub>1<sub>corr</sub></sub> )-((19c*60ab <sup>2</sup> )*A <sub>0</sub> )-((19c*15a <sup>2</sup> )*A <sub>0</sub> )-((19c*6a)*A <sub>2<sub>corr</sub></sub> )-((19c*15b <sup>4</sup> )*A <sub>0</sub> )-((19c*20b <sup>3</sup> )*A <sub>1<sub>corr</sub></sub> )-((19c*15b <sup>2</sup> )*A <sub>2<sub>corr</sub></sub> )-((19c*6b)*A <sub>3<sub>corr</sub></sub> )-(19c*A <sub>4<sub>corr</sub></sub> )-((171c <sup>2</sup> *30ab)*A <sub>0</sub> )-((171c <sup>2</sup> *6a)*A <sub>1<sub>corr</sub></sub> )-((171c <sup>2</sup> *20b <sup>3</sup> )*A <sub>0</sub> )-((171c <sup>2</sup> *15b <sup>2</sup> )*A <sub>1<sub>corr</sub></sub> )-((171c <sup>2</sup> *6b)*A <sub>2<sub>corr</sub></sub> )-(171c <sup>2</sup> *A <sub>3<sub>corr</sub></sub> )-((969c <sup>3</sup> *6a)*A <sub>0</sub> )-((969c <sup>3</sup> *15b <sup>2</sup> )*A <sub>0</sub> )-((969c <sup>3</sup> *6b)*A <sub>1<sub>corr</sub></sub> )-((969c <sup>3</sup> *A <sub>2<sub>corr</sub></sub> )-((3876c <sup>4</sup> *6b)*A <sub>0</sub> )-(3876c <sup>4</sup> *A <sub>1<sub>corr</sub></sub> )-(11628c <sup>5</sup> *A <sub>0</sub> )                                                                                                                                                                                                                                                                                                                                                                                                                                                                                                                                                                                                                                                                                                                                                                                                                                                                                                                                                         |
| A <sub>6<sub>corr</sub></sub>                         | A <sub>6</sub> -(b <sup>6</sup> *A <sub>0</sub> )-(60a <sup>2</sup> b*A <sub>1<sub>corr</sub></sub> )-(30ab*A <sub>3<sub>corr</sub></sub> )-(30ab <sup>4</sup> *A <sub>0</sub> )-(60ab <sup>3</sup> *A <sub>1<sub>corr</sub></sub> )-(60ab <sup>2</sup> *A <sub>2<sub>corr</sub></sub> )-(90a <sup>2</sup> b <sup>2</sup> *A <sub>0</sub> )-(20a <sup>3</sup> *A <sub>0</sub> )-(15a <sup>2</sup> *A <sub>2<sub>corr</sub></sub> )-(6a*A <sub>4<sub>corr</sub></sub> )-(6b <sup>5</sup> *A <sub>1<sub>corr</sub></sub> )-(15b <sup>4</sup> *A <sub>2<sub>corr</sub></sub> )-(20b <sup>3</sup> *A <sub>3<sub>corr</sub></sub> )-(15b <sup>2</sup> *A <sub>4<sub>corr</sub></sub> )-(6b*A <sub>5<sub>corr</sub></sub> )-((19c*60a <sup>2</sup> b)*A <sub>0</sub> )-((19c*30ab)*A <sub>2<sub>corr</sub></sub> )-((19c*60ab <sup>3</sup> )*A <sub>0</sub> )-((19c*60ab <sup>2</sup> )*A <sub>1<sub>corr</sub></sub> )-((19c*15a <sup>2</sup> )*A <sub>1<sub>corr</sub></sub> )-((19c*6a)*A <sub>3<sub>corr</sub></sub> )-((19c*6b <sup>5</sup> )*A <sub>0</sub> )-((19c*15b <sup>4</sup> )*A <sub>1<sub>corr</sub></sub> )-((19c*20b <sup>3</sup> )*A <sub>2<sub>corr</sub></sub> )-((19c*15b <sup>2</sup> )*A <sub>3<sub>corr</sub></sub> )-((19c*6b)*A <sub>4<sub>corr</sub></sub> )-(19c*A <sub>5<sub>corr</sub></sub> )-((171c <sup>2</sup> *30ab)*A <sub>1<sub>corr</sub></sub> )-((171c <sup>2</sup> *60ab <sup>2</sup> )*A <sub>0</sub> )-((171c <sup>2</sup> *15a <sup>2</sup> )*A <sub>0</sub> )-((171c <sup>2</sup> *6a)*A <sub>2<sub>corr</sub></sub> )-((171c <sup>2</sup> *15b <sup>4</sup> )*A <sub>0</sub> )-(171c <sup>2</sup> *20b <sup>3</sup> *A <sub>1<sub>corr</sub></sub> )-((171c <sup>2</sup> *15b <sup>2</sup> )*A <sub>2<sub>corr</sub></sub> )-((171c <sup>2</sup> *6b)*A <sub>3<sub>corr</sub></sub> )-(171c <sup>2</sup> *A <sub>4<sub>corr</sub></sub> )-((969c <sup>3</sup> *30ab)*A <sub>0</sub> )-((969c <sup>3</sup> *6a)*A <sub>1<sub>corr</sub></sub> )-((969c <sup>3</sup> *20b <sup>3</sup> )*A <sub>0</sub> )-((969c <sup>3</sup> *15b <sup>2</sup> )*A <sub>1<sub>corr</sub></sub> )-((969c <sup>3</sup> *6b)*A <sub>2<sub>corr</sub></sub> )-((969c <sup>3</sup> *A <sub>3<sub>corr</sub></sub> )-((3876c <sup>4</sup> *6a)*A <sub>0</sub> )-((3876c <sup>4</sup> *15b <sup>2</sup> )*A <sub>0</sub> )-((3876c <sup>4</sup> *6b)*A <sub>1<sub>corr</sub></sub> )-(3876c <sup>4</sup> *A <sub>2<sub>corr</sub></sub> )-((11628c <sup>5</sup> *6b)*A <sub>0</sub> )-(11628c <sup>5</sup> *A <sub>1<sub>corr</sub></sub> )-(27132c <sup>6</sup> *A <sub>0</sub> ) |

**S7P:** C<sub>7</sub>-backbone, to be corrected *sum formula*: C<sub>29</sub>Si<sub>7</sub>

| isotope inference corrected area of M+ n isotopologue | Equation for correction                                                                                                                                                                                                                                                                                                                                                                                                                                                                                                                                                                                                                                                                                                                                                                                                                                                                                                                                                                                                                                                                                                                                                                                                                                                                                                                                                                                                                                                                                                                                                                                                                                                                                                                                                                                                                                                                                                                                                                                                                                                                                                                                                                                                                                                                                                                                                                                                                                                                                                                                                                                                                                                                                                                                                                                                                                                                                                                                                                                                                                                                                                                                                                                                                                                                                                                                                                                                                                                                                                                                                                                                                                                                                                                                                                                                                                                                                |
|-------------------------------------------------------|--------------------------------------------------------------------------------------------------------------------------------------------------------------------------------------------------------------------------------------------------------------------------------------------------------------------------------------------------------------------------------------------------------------------------------------------------------------------------------------------------------------------------------------------------------------------------------------------------------------------------------------------------------------------------------------------------------------------------------------------------------------------------------------------------------------------------------------------------------------------------------------------------------------------------------------------------------------------------------------------------------------------------------------------------------------------------------------------------------------------------------------------------------------------------------------------------------------------------------------------------------------------------------------------------------------------------------------------------------------------------------------------------------------------------------------------------------------------------------------------------------------------------------------------------------------------------------------------------------------------------------------------------------------------------------------------------------------------------------------------------------------------------------------------------------------------------------------------------------------------------------------------------------------------------------------------------------------------------------------------------------------------------------------------------------------------------------------------------------------------------------------------------------------------------------------------------------------------------------------------------------------------------------------------------------------------------------------------------------------------------------------------------------------------------------------------------------------------------------------------------------------------------------------------------------------------------------------------------------------------------------------------------------------------------------------------------------------------------------------------------------------------------------------------------------------------------------------------------------------------------------------------------------------------------------------------------------------------------------------------------------------------------------------------------------------------------------------------------------------------------------------------------------------------------------------------------------------------------------------------------------------------------------------------------------------------------------------------------------------------------------------------------------------------------------------------------------------------------------------------------------------------------------------------------------------------------------------------------------------------------------------------------------------------------------------------------------------------------------------------------------------------------------------------------------------------------------------------------------------------------------------------------------|
| A <sub>0</sub>                                        | A <sub>0</sub>                                                                                                                                                                                                                                                                                                                                                                                                                                                                                                                                                                                                                                                                                                                                                                                                                                                                                                                                                                                                                                                                                                                                                                                                                                                                                                                                                                                                                                                                                                                                                                                                                                                                                                                                                                                                                                                                                                                                                                                                                                                                                                                                                                                                                                                                                                                                                                                                                                                                                                                                                                                                                                                                                                                                                                                                                                                                                                                                                                                                                                                                                                                                                                                                                                                                                                                                                                                                                                                                                                                                                                                                                                                                                                                                                                                                                                                                                         |
| A <sub>1<sub>corr</sub></sub>                         | A <sub>1</sub> -(7b*A <sub>0</sub> )-(22c*A <sub>0</sub> )                                                                                                                                                                                                                                                                                                                                                                                                                                                                                                                                                                                                                                                                                                                                                                                                                                                                                                                                                                                                                                                                                                                                                                                                                                                                                                                                                                                                                                                                                                                                                                                                                                                                                                                                                                                                                                                                                                                                                                                                                                                                                                                                                                                                                                                                                                                                                                                                                                                                                                                                                                                                                                                                                                                                                                                                                                                                                                                                                                                                                                                                                                                                                                                                                                                                                                                                                                                                                                                                                                                                                                                                                                                                                                                                                                                                                                             |
| A <sub>2<sub>corr</sub></sub>                         | A <sub>2</sub> -(7a*A <sub>1<sub>corr</sub></sub> )-(21b <sup>2</sup> *A <sub>0</sub> )-(7b*A <sub>1<sub>corr</sub></sub> )-((22c*7b)*A <sub>0</sub> )-(22c*A <sub>1<sub>corr</sub></sub> )-(231c <sup>2</sup> *A <sub>0</sub> )                                                                                                                                                                                                                                                                                                                                                                                                                                                                                                                                                                                                                                                                                                                                                                                                                                                                                                                                                                                                                                                                                                                                                                                                                                                                                                                                                                                                                                                                                                                                                                                                                                                                                                                                                                                                                                                                                                                                                                                                                                                                                                                                                                                                                                                                                                                                                                                                                                                                                                                                                                                                                                                                                                                                                                                                                                                                                                                                                                                                                                                                                                                                                                                                                                                                                                                                                                                                                                                                                                                                                                                                                                                                       |
| A <sub>3<sub>corr</sub></sub>                         | A <sub>3</sub> -(42ab*A <sub>0</sub> )-(7a*A <sub>1<sub>corr</sub></sub> )-(35b <sup>3</sup> *A <sub>0</sub> )-(21b <sup>2</sup> *A <sub>1<sub>corr</sub></sub> )-(7b*A <sub>2<sub>corr</sub></sub> )-((22c*7a)*A <sub>0</sub> )-((22c*21b <sup>2</sup> )*A <sub>0</sub> )-((22c*7b)*A <sub>1<sub>corr</sub></sub> )-(22c*A <sub>2<sub>corr</sub></sub> )-((231c <sup>2</sup> *7b)*A <sub>0</sub> )-((231c <sup>2</sup> *A <sub>1<sub>corr</sub></sub> )-(1540c <sup>3</sup> *A <sub>0</sub> )                                                                                                                                                                                                                                                                                                                                                                                                                                                                                                                                                                                                                                                                                                                                                                                                                                                                                                                                                                                                                                                                                                                                                                                                                                                                                                                                                                                                                                                                                                                                                                                                                                                                                                                                                                                                                                                                                                                                                                                                                                                                                                                                                                                                                                                                                                                                                                                                                                                                                                                                                                                                                                                                                                                                                                                                                                                                                                                                                                                                                                                                                                                                                                                                                                                                                                                                                                                                         |
| A <sub>4<sub>corr</sub></sub>                         | A <sub>4</sub> -(42ab*A <sub>1<sub>corr</sub></sub> )-(105ab <sup>2</sup> *A <sub>0</sub> )-(21a <sup>2</sup> *A <sub>0</sub> )-(7a*A <sub>2<sub>corr</sub></sub> )-(35b <sup>4</sup> *A <sub>0</sub> )-(35b <sup>3</sup> *A <sub>1<sub>corr</sub></sub> )-(21b <sup>2</sup> *A <sub>2<sub>corr</sub></sub> )-(7b*A <sub>3<sub>corr</sub></sub> )-((22c*42ab)*A <sub>0</sub> )-((22c*7a)*A <sub>1<sub>corr</sub></sub> )-((22c*35b <sup>3</sup> )*A <sub>0</sub> )-((22c*21b <sup>2</sup> )*A <sub>1<sub>corr</sub></sub> )-((22c*7b)*A <sub>2<sub>corr</sub></sub> )-(22c*A <sub>3<sub>corr</sub></sub> )-((231c <sup>2</sup> *7a)*A <sub>0</sub> )-((231c <sup>2</sup> *21b <sup>2</sup> )*A <sub>0</sub> )-(231c <sup>2</sup> *7b)*A <sub>1<sub>corr</sub></sub> -(231c <sup>2</sup> *A <sub>2<sub>corr</sub></sub> )-(1540c <sup>3</sup> *7b)*A <sub>0</sub> -(1540c <sup>3</sup> *A <sub>1<sub>corr</sub></sub> )-(7315c <sup>4</sup> *A <sub>0</sub> )                                                                                                                                                                                                                                                                                                                                                                                                                                                                                                                                                                                                                                                                                                                                                                                                                                                                                                                                                                                                                                                                                                                                                                                                                                                                                                                                                                                                                                                                                                                                                                                                                                                                                                                                                                                                                                                                                                                                                                                                                                                                                                                                                                                                                                                                                                                                                                                                                                                                                                                                                                                                                                                                                                                                                                                                                                                                                                                                           |
| A <sub>5<sub>corr</sub></sub>                         | A <sub>5</sub> -(105a <sup>2</sup> b*A <sub>0</sub> )-(42ab*A <sub>2<sub>corr</sub></sub> )-(140ab <sup>3</sup> *A <sub>0</sub> )-(105ab <sup>2</sup> *A <sub>1<sub>corr</sub></sub> )-(21a <sup>2</sup> *A <sub>1<sub>corr</sub></sub> )-(7a*A <sub>3<sub>corr</sub></sub> )-(21b <sup>5</sup> *A <sub>0</sub> )-(35b <sup>4</sup> *A <sub>1<sub>corr</sub></sub> )-(35b <sup>3</sup> *A <sub>2<sub>corr</sub></sub> )-(21b <sup>2</sup> *A <sub>3<sub>corr</sub></sub> )-(7b*A <sub>4<sub>corr</sub></sub> )-((22c*42ab)*A <sub>1<sub>corr</sub></sub> )-((22c*105ab <sup>2</sup> )*A <sub>0</sub> )-((22c*21a <sup>2</sup> )*A <sub>0</sub> )-((22c*7a)*A <sub>2<sub>corr</sub></sub> )-((22c*35c <sup>4</sup> )*A <sub>0</sub> )-((22c*35b <sup>3</sup> )*A <sub>1<sub>corr</sub></sub> )-(22c*21b <sup>2</sup> )*A <sub>2<sub>corr</sub></sub> -(22c*7b)*A <sub>3<sub>corr</sub></sub> -(22c*A <sub>4<sub>corr</sub></sub> )-((231c <sup>2</sup> *42ab)*A <sub>0</sub> )-((231c <sup>2</sup> *7a)*A <sub>1<sub>corr</sub></sub> )-((231c <sup>2</sup> *35b <sup>3</sup> )*A <sub>0</sub> )-((231c <sup>2</sup> *21b <sup>2</sup> )*A <sub>1<sub>corr</sub></sub> )-((231c <sup>2</sup> *7b)*A <sub>2<sub>corr</sub></sub> )-(231c <sup>2</sup> *A <sub>3<sub>corr</sub></sub> )-((1540c <sup>3</sup> *7a)*A <sub>0</sub> )-((1540c <sup>3</sup> *21b <sup>2</sup> )*A <sub>0</sub> )-((1540c <sup>3</sup> *7b)*A <sub>1<sub>corr</sub></sub> )-(1540c <sup>3</sup> *A <sub>2<sub>corr</sub></sub> )-((7315c <sup>4</sup> *7b)*A <sub>0</sub> )-(7315c <sup>4</sup> *A <sub>1<sub>corr</sub></sub> )-(26334c <sup>5</sup> *A <sub>0</sub> )                                                                                                                                                                                                                                                                                                                                                                                                                                                                                                                                                                                                                                                                                                                                                                                                                                                                                                                                                                                                                                                                                                                                                                                                                                                                                                                                                                                                                                                                                                                                                                                                                                                                                                                                                                                                                                                                                                                                                                                                                                                                                                                                                                                                                                                        |
| A <sub>6<sub>corr</sub></sub>                         | A <sub>6</sub> -(105a <sup>2</sup> b*A <sub>1<sub>corr</sub></sub> )-(42ab*A <sub>3<sub>corr</sub></sub> )-(105ab <sup>4</sup> *A <sub>0</sub> )-(140ab <sup>3</sup> *A <sub>1<sub>corr</sub></sub> )-(105ab <sup>2</sup> *A <sub>2<sub>corr</sub></sub> )-(210a <sup>2</sup> b <sup>2</sup> *A <sub>0</sub> )-(35a <sup>3</sup> *A <sub>0</sub> )-(21a <sup>2</sup> *A <sub>2<sub>corr</sub></sub> )-(7a*A <sub>4<sub>corr</sub></sub> )-(7b <sup>6</sup> *A <sub>0</sub> )-(21b <sup>5</sup> *A <sub>1<sub>corr</sub></sub> )-(35b <sup>4</sup> *A <sub>2<sub>corr</sub></sub> )-(35b <sup>3</sup> *A <sub>3<sub>corr</sub></sub> )-(21b <sup>2</sup> *A <sub>4<sub>corr</sub></sub> )-(7b*A <sub>5<sub>corr</sub></sub> )-((22c*105a <sup>2</sup> b)*A <sub>0</sub> )-((22c*42ab)*A <sub>2<sub>corr</sub></sub> )-((22c*140ab <sup>3</sup> )*A <sub>0</sub> )-((22c*105ab <sup>2</sup> )*A <sub>1<sub>corr</sub></sub> )-((22c*21a <sup>2</sup> )*A <sub>1<sub>corr</sub></sub> )-((22c*7a)*A <sub>3<sub>corr</sub></sub> )-((22c*21b <sup>5</sup> )*A <sub>0</sub> )-((22c*35b <sup>4</sup> )*A <sub>1<sub>corr</sub></sub> )-((22c*35b <sup>3</sup> )*A <sub>2<sub>corr</sub></sub> )-((22c*21b <sup>2</sup> )*A <sub>3<sub>corr</sub></sub> )-((22c*7b)*A <sub>4<sub>corr</sub></sub> )-(22c*A <sub>5<sub>corr</sub></sub> )-((231c <sup>2</sup> *42ab)*A <sub>1<sub>corr</sub></sub> )-((231c <sup>2</sup> *105ab <sup>2</sup> )*A <sub>0</sub> )-((231c <sup>2</sup> *21a <sup>2</sup> )*A <sub>0</sub> )-((231c <sup>2</sup> *7a)*A <sub>2<sub>corr</sub></sub> )-((231c <sup>2</sup> *35b <sup>4</sup> )*A <sub>0</sub> )-((231c <sup>2</sup> *35b <sup>3</sup> )*A <sub>1<sub>corr</sub></sub> )-((231c <sup>2</sup> *21b <sup>2</sup> )*A <sub>2<sub>corr</sub></sub> )-((231c <sup>2</sup> *7b)*A <sub>3<sub>corr</sub></sub> )-(231c <sup>2</sup> *A <sub>4<sub>corr</sub></sub> )-((1540c <sup>3</sup> *42ab)*A <sub>0</sub> )-((1540c <sup>3</sup> *7a)*A <sub>1<sub>corr</sub></sub> )-((1540c <sup>3</sup> *35b <sup>3</sup> )*A <sub>0</sub> )-((1540c <sup>3</sup> *21b <sup>2</sup> )*A <sub>1<sub>corr</sub></sub> )-((1540c <sup>3</sup> *7b)*A <sub>2<sub>corr</sub></sub> )-((1540c <sup>3</sup> *A <sub>3<sub>corr</sub></sub> )-((7315c <sup>4</sup> *7a)*A <sub>0</sub> )-((7315c <sup>4</sup> *21b <sup>2</sup> )*A <sub>0</sub> )-((7315c <sup>4</sup> *7b)*A <sub>1<sub>corr</sub></sub> )-(7315c <sup>4</sup> *A <sub>2<sub>corr</sub></sub> )-(26334c <sup>5</sup> *7b)*A <sub>0</sub> -(26334c <sup>5</sup> *A <sub>1<sub>corr</sub></sub> )-(74613c <sup>6</sup> *A <sub>0</sub> )                                                                                                                                                                                                                                                                                                                                                                                                                                                                                                                                                                                                                                                                                                                                                                                                                                                                                                                                                                                                                                                                                                                                                                                                                                                                                  |
| A <sub>7<sub>corr</sub></sub>                         | A <sub>7</sub> -(b <sup>7</sup> *A <sub>0</sub> )-(140a <sup>3</sup> b*A <sub>0</sub> )-(105a <sup>2</sup> b*A <sub>2<sub>corr</sub></sub> )-(42ab*A <sub>4<sub>corr</sub></sub> )-(42ab <sup>5</sup> *A <sub>0</sub> )-(105ab <sup>4</sup> *A <sub>1<sub>corr</sub></sub> )-(140ab <sup>3</sup> *A <sub>2<sub>corr</sub></sub> )-(105ab <sup>2</sup> *A <sub>3<sub>corr</sub></sub> )-(210a <sup>2</sup> b <sup>3</sup> *A <sub>0</sub> )-(210a <sup>2</sup> b <sup>2</sup> *A <sub>1<sub>corr</sub></sub> )-(35a <sup>3</sup> *A <sub>1<sub>corr</sub></sub> )-(21a <sup>2</sup> *A <sub>3<sub>corr</sub></sub> )-(7a*A <sub>5<sub>corr</sub></sub> )-(7b <sup>6</sup> *A <sub>1<sub>corr</sub></sub> )-(21b <sup>5</sup> *A <sub>2<sub>corr</sub></sub> )-(35b <sup>4</sup> *A <sub>3<sub>corr</sub></sub> )-(35b <sup>3</sup> *A <sub>4<sub>corr</sub></sub> )-(21b <sup>2</sup> *A <sub>5<sub>corr</sub></sub> )-(7b*A <sub>6<sub>corr</sub></sub> )-((22c*105a <sup>2</sup> b)*A <sub>1<sub>corr</sub></sub> )-((22c*42ab)*A <sub>3<sub>corr</sub></sub> )-((22c*105ab <sup>4</sup> )*A <sub>0</sub> )-((22c*140ab <sup>3</sup> )*A <sub>1<sub>corr</sub></sub> )-((22c*105ab <sup>2</sup> )*A <sub>2<sub>corr</sub></sub> )-((22c*210a <sup>2</sup> b <sup>2</sup> )*A <sub>0</sub> )-((22c*35a <sup>3</sup> )*A <sub>0</sub> )-((22c*21a <sup>2</sup> )*A <sub>2<sub>corr</sub></sub> )-((22c*7a)*A <sub>4<sub>corr</sub></sub> )-((22c*7b <sup>6</sup> )*A <sub>0</sub> )-((22c*21b <sup>5</sup> )*A <sub>1<sub>corr</sub></sub> )-((22c*35b <sup>4</sup> )*A <sub>2<sub>corr</sub></sub> )-((22c*35b <sup>3</sup> )*A <sub>3<sub>corr</sub></sub> )-((22c*21b <sup>2</sup> )*A <sub>4<sub>corr</sub></sub> )-((22c*7b)*A <sub>5<sub>corr</sub></sub> )-((22c*A <sub>6<sub>corr</sub></sub> )-((231c <sup>2</sup> *105a <sup>2</sup> b)*A <sub>0</sub> )-((231c <sup>2</sup> *42ab)*A <sub>2<sub>corr</sub></sub> )-((231c <sup>2</sup> *140ab <sup>3</sup> )*A <sub>0</sub> )-((231c <sup>2</sup> *105ab <sup>2</sup> )*A <sub>1<sub>corr</sub></sub> )-((231c <sup>2</sup> *21a <sup>2</sup> )*A <sub>1<sub>corr</sub></sub> )-((231c <sup>2</sup> *7a)*A <sub>3<sub>corr</sub></sub> )-((231c <sup>2</sup> *21b <sup>5</sup> )*A <sub>0</sub> )-((231c <sup>2</sup> *35b <sup>4</sup> )*A <sub>1<sub>corr</sub></sub> )-((231c <sup>2</sup> *35b <sup>3</sup> )*A <sub>2<sub>corr</sub></sub> )-((231c <sup>2</sup> *21b <sup>2</sup> )*A <sub>3<sub>corr</sub></sub> )-((231c <sup>2</sup> *7b)*A <sub>4<sub>corr</sub></sub> )-((231c <sup>2</sup> *A <sub>5<sub>corr</sub></sub> )-((1540c <sup>3</sup> *42ab)*A <sub>1<sub>corr</sub></sub> )-((1540c <sup>3</sup> *105ab <sup>2</sup> )*A <sub>0</sub> )-((1540c <sup>3</sup> *21a <sup>2</sup> )*A <sub>0</sub> )-((1540c <sup>3</sup> *7a)*A <sub>2<sub>corr</sub></sub> )-((1540c <sup>3</sup> *35b <sup>3</sup> )*A <sub>0</sub> )-((1540c <sup>3</sup> *35b <sup>3</sup> )*A <sub>1<sub>corr</sub></sub> )-((1540c <sup>3</sup> *21b <sup>2</sup> )*A <sub>2<sub>corr</sub></sub> )-((1540c <sup>3</sup> *7b)*A <sub>3<sub>corr</sub></sub> )-((1540c <sup>3</sup> *A <sub>4<sub>corr</sub></sub> )-((7315c <sup>4</sup> *42ab)*A <sub>0</sub> )-((7315c <sup>4</sup> *7a)*A <sub>1<sub>corr</sub></sub> )-((7315c <sup>4</sup> *35b <sup>3</sup> )*A <sub>0</sub> )-((7315c <sup>4</sup> *21b <sup>2</sup> )*A <sub>1<sub>corr</sub></sub> )-((7315c <sup>4</sup> *7b)*A <sub>2<sub>corr</sub></sub> )-((7315c <sup>4</sup> *A <sub>3<sub>corr</sub></sub> )-((26334c <sup>5</sup> *7a)*A <sub>0</sub> )-((26334c <sup>5</sup> *21b <sup>2</sup> )*A <sub>0</sub> )-((26334c <sup>5</sup> *7b)*A <sub>1<sub>corr</sub></sub> )-((26334c <sup>5</sup> *A <sub>2<sub>corr</sub></sub> )-((74613c <sup>6</sup> *7b)*A <sub>0</sub> )-(74613c <sup>6</sup> *A <sub>1<sub>corr</sub></sub> )-(170544c <sup>7</sup> *A <sub>0</sub> ) |

**Table S2** Isotopologue fractions of metabolites implemented into metabolic network model, including the Monte Carlo simulated

|          | Biological Replicate 1                |                      |                      |                          | Biological Replicate 2                |                      |                      |                          | Biological Replicate 3                |                      |                      |                          |
|----------|---------------------------------------|----------------------|----------------------|--------------------------|---------------------------------------|----------------------|----------------------|--------------------------|---------------------------------------|----------------------|----------------------|--------------------------|
|          | Input areas<br>(before<br>correction) | IF<br>corrected<br>% | IF<br>corrected<br>U | IF<br>corrected<br>rel.U | Input areas<br>(before<br>correction) | IF<br>corrected<br>% | IF<br>corrected<br>U | IF<br>corrected<br>rel.U | Input areas<br>(before<br>correction) | IF<br>corrected<br>% | IF<br>corrected<br>U | IF<br>corrected<br>rel.U |
| PEP M    | 7187                                  | <b>22.328</b>        | <b>0.312</b>         | <b>1.40%</b>             | 4070                                  | <b>17.116</b>        | <b>0.282</b>         | <b>1.65%</b>             | 4337                                  | <b>19.607</b>        | <b>0.321</b>         | <b>1.64%</b>             |
| PEP M+1  | 26796                                 | <b>77.672</b>        | <b>0.312</b>         | <b>0.40%</b>             | 20360                                 | <b>81.348</b>        | <b>0.406</b>         | <b>0.50%</b>             | 18865                                 | <b>80.393</b>        | <b>0.321</b>         | <b>0.40%</b>             |
| PEP M+2  | 191                                   | -21.648              | 0.309                | -1.43%                   | 5262                                  | -0.367               | 0.498                | -135.46%                 | 220                                   | -21.579              | 0.321                | -1.49%                   |
| PEP M+3  | 124                                   | -9.990               | 0.092                | -0.92%                   | 2917                                  | <b>1.535</b>         | <b>0.269</b>         | <b>17.51%</b>            | 184                                   | -9.833               | 0.107                | -1.09%                   |
| GAP M    | 16889                                 | <b>22.179</b>        | <b>0.254</b>         | <b>1.1%</b>              | 10200                                 | <b>17.5</b>          | <b>0.23</b>          | <b>1.3%</b>              | 8485                                  | <b>17.832</b>        | <b>0.240</b>         | <b>1.3%</b>              |
| GAP M+1  | 59006                                 | <b>71.467</b>        | <b>0.495</b>         | <b>0.7%</b>              | 47030                                 | <b>75.8</b>          | <b>0.52</b>          | <b>0.7%</b>              | 37982                                 | <b>74.983</b>        | <b>0.534</b>         | <b>0.7%</b>              |
| GAP M+2  | 20733                                 | <b>4.884</b>         | <b>0.456</b>         | <b>9.3%</b>              | 16298                                 | <b>5.0</b>           | <b>0.49</b>          | <b>9.7%</b>              | 13614                                 | <b>5.892</b>         | <b>0.496</b>         | <b>8.4%</b>              |
| GAP M+3  | 9773                                  | <b>1.469</b>         | <b>0.183</b>         | <b>12.4%</b>             | 7917                                  | <b>1.7</b>           | <b>0.20</b>          | <b>11.9%</b>             | 6325                                  | <b>1.293</b>         | <b>0.213</b>         | <b>16.5%</b>             |
| 2PG M    | 4838                                  | <b>33.4</b>          | <b>0.5085</b>        | <b>1.5%</b>              | 1914                                  | <b>11.4</b>          | <b>0.2794</b>        | <b>2.5%</b>              | 2181                                  | <b>18.9</b>          | <b>0.4297</b>        | <b>2.3%</b>              |
| 2PG M+1  | 11267                                 | <b>66.6</b>          | <b>0.5085</b>        | <b>0.8%</b>              | 15559                                 | <b>88.6</b>          | <b>0.2794</b>        | <b>0.3%</b>              | 10029                                 | <b>80.6</b>          | <b>0.8006</b>        | <b>1.0%</b>              |
| 2PG M+2  | 3270                                  | -5.8                 | 0.5839               | -10.1%                   | 2545                                  | -16.5                | 0.5298               | -3.2%                    | 3560                                  | <b>0.5</b>           | <b>0.7539</b>        | <b>141.6%</b>            |
| 2PG M+3  | 1886                                  | -0.6                 | 0.3720               | -58.4%                   | 1583                                  | -7.4                 | 0.3088               | -4.2%                    | 1815                                  | -0.1                 | 0.4375               | -775.0%                  |
| DHAP M   | 58885                                 | <b>26.4</b>          | <b>0.26</b>          | <b>1.0%</b>              | 36988                                 | <b>22.1</b>          | <b>0.2</b>           | <b>1.0%</b>              | 30549                                 | <b>20.5</b>          | <b>0.22</b>          | <b>1.1%</b>              |
| DHAP M+1 | 171641                                | <b>69.7</b>          | <b>0.46</b>          | <b>0.7%</b>              | 133360                                | <b>73.5</b>          | <b>0.5</b>           | <b>0.6%</b>              | 118357                                | <b>73.9</b>          | <b>0.48</b>          | <b>0.6%</b>              |
| DHAP M+2 | 58301                                 | <b>3.7</b>           | <b>0.42</b>          | <b>11.4%</b>             | 45115                                 | <b>4.0</b>           | <b>0.4</b>           | <b>11.0%</b>             | 41604                                 | <b>5.2</b>           | <b>0.45</b>          | <b>8.7%</b>              |
| DHAP M+3 | 24830                                 | <b>0.2</b>           | <b>0.14</b>          | <b>64.1%</b>             | 19758                                 | <b>0.4</b>           | <b>0.1</b>           | <b>38.7%</b>             | 18189                                 | <b>0.5</b>           | <b>0.15</b>          | <b>31.5%</b>             |
| 3PG M    | 57203                                 | <b>20.4</b>          | <b>0.218</b>         | <b>1.1%</b>              | 31769                                 | <b>7.6</b>           | <b>0.091</b>         | <b>1.2%</b>              | 35850                                 | <b>15.3</b>          | <b>0.174</b>         | <b>1.1%</b>              |
| 3PG M+1  | 242520                                | <b>79.6</b>          | <b>0.218</b>         | <b>0.3%</b>              | 397295                                | <b>92.4</b>          | <b>0.091</b>         | <b>0.1%</b>              | 210681                                | <b>84.7</b>          | <b>0.174</b>         | <b>0.2%</b>              |
| 3PG M+2  | 82359                                 | -0.9                 | 0.521                | -57.1%                   | 64116                                 | -16.8                | 0.496                | -2.9%                    | 70005                                 | -1.2                 | 0.549                | -46.6%                   |
| 3PG M+3  | 36496                                 | -2.5                 | 0.213                | -8.6%                    | 29064                                 | -10.3                | 0.178                | -1.7%                    | 32245                                 | -2.5                 | 0.225                | -9.2%                    |



|          | Biological Replicate 1                |                      |                      |                          | Biological Replicate 2                |                      |                      |                          | Biological Replicate 3                |                      |                      |                          |
|----------|---------------------------------------|----------------------|----------------------|--------------------------|---------------------------------------|----------------------|----------------------|--------------------------|---------------------------------------|----------------------|----------------------|--------------------------|
|          | Input areas<br>(before<br>correction) | IF<br>corrected<br>% | IF<br>corrected<br>U | IF<br>corrected<br>rel.U | Input areas<br>(before<br>correction) | IF<br>corrected<br>% | IF<br>corrected<br>U | IF<br>corrected<br>rel.U | Input areas<br>(before<br>correction) | IF<br>corrected<br>% | IF<br>corrected<br>U | IF<br>corrected<br>rel.U |
| E4P M    | 0                                     | <b>0.0</b>           | <b>0.0000</b>        | -                        | 0                                     | <b>0.0</b>           | <b>0.0000</b>        | -                        | 0                                     | <b>0.0</b>           | <b>0.0000</b>        | -                        |
| E4P M+1  | 1455                                  | <b>100.0</b>         | <b>0.0000</b>        | <b>0.0%</b>              | 898                                   | <b>71.5</b>          | <b>2.0080</b>        | <b>2.8%</b>              | 925                                   | <b>100.0</b>         | <b>0.0000</b>        | <b>0.0%</b>              |
| E4P M+2  | 459                                   | -2.9                 | 1.8060               | -63.3%                   | 667                                   | <b>28.5</b>          | <b>2.0080</b>        | <b>7.0%</b>              | 276                                   | -4.5                 | 2.1500               | -47.7%                   |
| E4P M+3  | 0                                     | -18.7                | 0.1787               | -1.0%                    | 0                                     | -23.2                | 0.3901               | -1.7%                    | 0                                     | -18.7                | 0.1788               | -1.0%                    |
| E4P M+4  | 0                                     | -4.4                 | 0.0979               | -2.2%                    | 0                                     | -8.5                 | 0.2958               | -3.5%                    | 0                                     | -4.4                 | 0.0979               | -2.2%                    |
| R5P M    | 8298                                  | <b>13.09</b>         | <b>0.1883</b>        | <b>1.4%</b>              | 6924                                  | <b>9.99</b>          | <b>0.1561</b>        | <b>1.6%</b>              | 5106                                  | <b>10.73</b>         | <b>0.1778</b>        | <b>1.7%</b>              |
| R5P M+1  | 57540                                 | <b>85.18</b>         | <b>0.2624</b>        | <b>0.3%</b>              | 63924                                 | <b>87.97</b>         | <b>0.7092</b>        | <b>0.8%</b>              | 38603                                 | <b>76.54</b>         | <b>0.7125</b>        | <b>0.9%</b>              |
| R5P M+2  | 25087                                 | -0.09                | 0.7657               | -828.7%                  | 27864                                 | <b>0.12</b>          | <b>0.7806</b>        | <b>625.2%</b>            | 21403                                 | <b>9.59</b>          | <b>0.7218</b>        | <b>7.5%</b>              |
| R5P M+3  | 13721                                 | -0.73                | 0.3930               | -53.9%                   | 15627                                 | -0.35                | 0.3048               | -86.1%                   | 12976                                 | <b>3.14</b>          | <b>0.3742</b>        | <b>11.9%</b>             |
| R5P M+4  | 5211                                  | <b>1.69</b>          | <b>0.1953</b>        | <b>11.5%</b>             | 5738                                  | <b>1.59</b>          | <b>0.1604</b>        | <b>10.1%</b>             | 4371                                  | -0.41                | 0.2077               | -50.6%                   |
| R5P M+5  | 1756                                  | <b>0.03</b>          | <b>0.0881</b>        | <b>269.1%</b>            | 2131                                  | <b>0.32</b>          | <b>0.0895</b>        | <b>27.6%</b>             | 1291                                  | -0.58                | 0.1141               | -19.5%                   |
| RI5P M   | 6800                                  | <b>13.60</b>         | <b>0.2081</b>        | <b>1.5%</b>              | 4432                                  | <b>8.95</b>          | <b>0.1545</b>        | <b>1.7%</b>              | 2647                                  | <b>8.11</b>          | <b>0.1659</b>        | <b>2.0%</b>              |
| RI5P M+1 | 44736                                 | <b>83.66</b>         | <b>0.6909</b>        | <b>0.8%</b>              | 46460                                 | <b>90.02</b>         | <b>0.2426</b>        | <b>0.3%</b>              | 26403                                 | <b>77.48</b>         | <b>0.7535</b>        | <b>1.0%</b>              |
| RI5P M+2 | 19641                                 | <b>0.13</b>          | <b>0.7665</b>        | <b>573.3%</b>            | 19896                                 | -0.51                | 0.8104               | -159.8%                  | 14918                                 | <b>10.61</b>         | <b>0.7518</b>        | <b>7.1%</b>              |
| RI5P M+3 | 11495                                 | <b>0.90</b>          | <b>0.3307</b>        | <b>36.6%</b>             | 10228                                 | -2.63                | 0.4064               | -15.5%                   | 9263                                  | <b>3.79</b>          | <b>0.4192</b>        | <b>11.1%</b>             |
| RI5P M+4 | 4099                                  | <b>1.35</b>          | <b>0.1867</b>        | <b>13.8%</b>             | 3869                                  | <b>1.03</b>          | <b>0.2067</b>        | <b>20.1%</b>             | 3012                                  | -0.90                | 0.2375               | -26.3%                   |
| RI5P M+5 | 1577                                  | <b>0.36</b>          | <b>0.1066</b>        | <b>29.8%</b>             | 1263                                  | <b>0.01</b>          | <b>0.0948</b>        | <b>1488.1%</b>           | 748                                   | -1.25                | 0.1264               | -10.1%                   |

|         | Biological Replicate 1                |                      |                      |                          | Biological Replicate 2                |                      |                      |                          | Biological Replicate 3                |                      |                      |                          |
|---------|---------------------------------------|----------------------|----------------------|--------------------------|---------------------------------------|----------------------|----------------------|--------------------------|---------------------------------------|----------------------|----------------------|--------------------------|
|         | Input areas<br>(before<br>correction) | IF<br>corrected<br>% | IF<br>corrected<br>U | IF<br>corrected<br>rel.U | Input areas<br>(before<br>correction) | IF<br>corrected<br>% | IF<br>corrected<br>U | IF<br>corrected<br>rel.U | Input areas<br>(before<br>correction) | IF<br>corrected<br>% | IF<br>corrected<br>U | IF<br>corrected<br>rel.U |
| F6P M   | 12292                                 | <b>9.8</b>           | <b>0.1331</b>        | <b>1.4%</b>              | 10408                                 | <b>7.5</b>           | <b>0.1105</b>        | <b>1.5%</b>              | 8059                                  | <b>6.8</b>           | <b>0.1052</b>        | <b>1.5%</b>              |
| F6P M+1 | 49717                                 | <b>34.6</b>          | <b>0.3787</b>        | <b>1.1%</b>              | 51064                                 | <b>33.0</b>          | <b>0.3791</b>        | <b>1.1%</b>              | 43492                                 | <b>33.3</b>          | <b>0.3789</b>        | <b>1.1%</b>              |
| F6P M+2 | 93411                                 | <b>53.6</b>          | <b>0.4475</b>        | <b>0.8%</b>              | 106413                                | <b>57.5</b>          | <b>0.5808</b>        | <b>1.0%</b>              | 89332                                 | <b>56.4</b>          | <b>0.5837</b>        | <b>1.0%</b>              |
| F6P M+3 | 47825                                 | -1.5                 | 0.6353               | -42.5%                   | 58596                                 | <b>1.5</b>           | <b>0.6699</b>        | <b>46.0%</b>             | 50208                                 | <b>2.2</b>           | <b>0.6634</b>        | <b>30.0%</b>             |
| F6P M+4 | 25697                                 | -1.0                 | 0.3584               | -35.5%                   | 31496                                 | -0.5                 | 0.2966               | -59.8%                   | 28629                                 | <b>1.0</b>           | <b>0.3139</b>        | <b>32.3%</b>             |
| F6P M+5 | 11705                                 | <b>2.0</b>           | <b>0.1829</b>        | <b>9.2%</b>              | 12003                                 | <b>0.5</b>           | <b>0.1641</b>        | <b>32.5%</b>             | 10746                                 | <b>0.3</b>           | <b>0.1742</b>        | <b>55.0%</b>             |
| F6P M+6 | 3799                                  | -0.4                 | 0.0769               | -19.1%                   | 3521                                  | -0.4                 | 0.0718               | -17.0%                   | 3398                                  | -0.3                 | 0.0839               | -24.2%                   |
| G6P M   | 135074                                | <b>7.5</b>           | <b>0.0925</b>        | <b>1.2%</b>              | 61876                                 | <b>4.6</b>           | <b>0.0589</b>        | <b>1.3%</b>              | 56931                                 | <b>4.7</b>           | <b>0.0579</b>        | <b>1.2%</b>              |
| G6P M+1 | 423549                                | <b>19.7</b>          | <b>0.2268</b>        | <b>1.2%</b>              | 281296                                | <b>18.6</b>          | <b>0.2176</b>        | <b>1.2%</b>              | 250380                                | <b>18.2</b>          | <b>0.2029</b>        | <b>1.1%</b>              |
| G6P M+2 | 1523656                               | <b>72.1</b>          | <b>0.6795</b>        | <b>0.9%</b>              | 1170308                               | <b>76.2</b>          | <b>0.7093</b>        | <b>0.9%</b>              | 1046916                               | <b>75.2</b>          | <b>0.7001</b>        | <b>0.9%</b>              |
| G6P M+3 | 805286                                | <b>0.7</b>           | <b>0.7525</b>        | <b>103.8%</b>            | 616549                                | <b>0.5</b>           | <b>0.7873</b>        | <b>147.0%</b>            | 550890                                | <b>0.5</b>           | <b>0.7785</b>        | <b>158.4%</b>            |
| G6P M+4 | 441285                                | -1.6                 | 0.2773               | -17.4%                   | 340706                                | -1.7                 | 0.2868               | -16.9%                   | 343251                                | <b>1.5</b>           | <b>0.3063</b>        | <b>20.4%</b>             |
| G6P M+5 | 152261                                | -0.6                 | 0.1436               | -25.3%                   | 116695                                | -0.6                 | 0.1476               | -22.8%                   | 108089                                | -1.1                 | 0.1566               | -14.4%                   |
| G6P M+6 | 46143                                 | -0.5                 | 0.0483               | -9.7%                    | 36908                                 | -0.4                 | 0.0507               | -11.9%                   | 34085                                 | -0.8                 | 0.0871               | -10.7%                   |
| S7P M   | 11269                                 | <b>10.40</b>         | <b>0.1578</b>        | <b>1.5%</b>              | 7028                                  | <b>7.41</b>          | <b>0.1228</b>        | <b>1.7%</b>              | 5353                                  | <b>7.56</b>          | <b>0.1336</b>        | <b>1.8%</b>              |
| S7P M+1 | 78733                                 | <b>66.48</b>         | <b>0.7571</b>        | <b>1.1%</b>              | 69047                                 | <b>68.38</b>         | <b>0.7817</b>        | <b>1.1%</b>              | 47172                                 | <b>62.17</b>         | <b>0.7401</b>        | <b>1.2%</b>              |
| S7P M+2 | 69363                                 | <b>20.38</b>         | <b>0.7962</b>        | <b>3.9%</b>              | 62804                                 | <b>22.64</b>         | <b>0.8078</b>        | <b>3.6%</b>              | 47476                                 | <b>27.16</b>         | <b>0.7703</b>        | <b>2.8%</b>              |
| S7P M+3 | 46702                                 | <b>2.74</b>          | <b>0.5387</b>        | <b>19.6%</b>             | 41163                                 | <b>1.40</b>          | <b>0.5684</b>        | <b>40.6%</b>             | 32009                                 | <b>3.03</b>          | <b>0.6073</b>        | <b>20.0%</b>             |
| S7P M+4 | 21976                                 | -0.53                | 0.3217               | -60.4%                   | 19816                                 | -0.15                | 0.3330               | -219.0%                  | 14852                                 | -1.86                | 0.3538               | -19.0%                   |
| S7P M+5 | 8984                                  | -0.14                | 0.1987               | -141.9%                  | 7643                                  | -0.25                | 0.2029               | -80.5%                   | 6108                                  | -0.67                | 0.2209               | -33.1%                   |
| S7P M+6 | 3007                                  | -0.06                | 0.0846               | -153.4%                  | 2797                                  | <b>0.17</b>          | <b>0.0886</b>        | <b>50.7%</b>             | 2182                                  | -0.11                | 0.1021               | -93.7%                   |
| S7P M+7 | 819                                   | -0.07                | 0.0379               | -52.4%                   | 835                                   | -0.02                | 0.0480               | -293.1%                  | 723                                   | <b>0.08</b>          | <b>0.0486</b>        | <b>58.4%</b>             |

**Table S3** Isotopologues from metabolites in the pentose phosphate pathway suggesting missing reactions in the model or measurement bias. The metabolites are expected to be part of a linear pathway and show the same labeling patterns, but differences of more than 10% are observed

|                     |         | Average | SD  |
|---------------------|---------|---------|-----|
| Glucose-6-Phosphate | G6P_M   | 3.0     | 1.2 |
|                     | G6P_M1  | 17.6    | 0.7 |
|                     | G6P_M2  | 77.8    | 0.9 |
|                     | G6P_M3  | 1.6     | 2.8 |
|                     | G6P_M4  | 0.0     | 0.0 |
|                     | G6P_M5  | 0.0     | 0.0 |
|                     | G6P_M6  | 0.0     | 0.0 |
| 6-phosphogluconate  | 6PGA_M  | 14.8    | 2.5 |
|                     | 6PGA_M1 | 20.9    | 2.8 |
|                     | 6PGA_M2 | 63.8    | 1.6 |
|                     | 6PGA_M3 | 0.2     | 0.4 |
|                     | 6PGA_M4 | 0.0     | 0.1 |
|                     | 6PGA_M5 | 0.1     | 0.2 |
|                     | 6PGA_M6 | 0.0     | 0.0 |

**Table S4** Measured and simulated isotopologue fractions handling uncertainties using different strategies

|         | Measurement | Standard deviation (SD) | Simulated values using all measurements | Simulated values using measurements >2% | Simulated values using measurements > 2% and 3 fold SD increase to cover biological variance | Simulated values using measurements > 2% and 3-fold SD increase to cover biological variance except for F6P and G6P (M+2 and M+3) |
|---------|-------------|-------------------------|-----------------------------------------|-----------------------------------------|----------------------------------------------------------------------------------------------|-----------------------------------------------------------------------------------------------------------------------------------|
| GAP_M   | 0.192       | 0.021                   | 0.157                                   | 0.157                                   | 0.157                                                                                        | 0.154                                                                                                                             |
| GAP_M1  | 0.741       | 0.019                   | 0.825                                   | 0.825                                   | 0.825                                                                                        | 0.828                                                                                                                             |
| GAP_M2  | 0.053       | 0.004                   | 0.018                                   | 0.018                                   | 0.018                                                                                        | 0.018                                                                                                                             |
| GAP_M3  | 0.015       | 0.002                   | 0.000                                   |                                         |                                                                                              |                                                                                                                                   |
| DHAP_M  | 0.230       | 0.025                   | 0.246                                   | 0.246                                   | 0.246                                                                                        | 0.246                                                                                                                             |
| DHAP_M1 | 0.724       | 0.019                   | 0.738                                   | 0.738                                   | 0.738                                                                                        | 0.738                                                                                                                             |
| DHAP_M2 | 0.043       | 0.006                   | 0.016                                   | 0.016                                   | 0.016                                                                                        | 0.016                                                                                                                             |
| DHAP_M3 | 0.004       | 0.001                   | 0.000                                   |                                         |                                                                                              |                                                                                                                                   |
| E4P_M   | 0.000       | 0.152                   | 0.041                                   |                                         |                                                                                              |                                                                                                                                   |
| E4P_M1  | 0.905       | 0.134                   | 0.929                                   | 0.929                                   | 0.929                                                                                        | 0.932                                                                                                                             |
| E4P_M2  | 0.071       | 0.152                   | 0.030                                   | 0.030                                   | 0.030                                                                                        | 0.030                                                                                                                             |
| E4P_M3  | 0.000       | 0.021                   | 0.000                                   |                                         |                                                                                              |                                                                                                                                   |
| E4P_M4  | 0.000       | 0.019                   | 0.000                                   |                                         |                                                                                              |                                                                                                                                   |
| RI5P_M  | 0.102       | 0.024                   | 0.038                                   | 0.038                                   | 0.038                                                                                        | 0.037                                                                                                                             |
| RI5P_M1 | 0.837       | 0.051                   | 0.922                                   | 0.922                                   | 0.922                                                                                        | 0.922                                                                                                                             |
| RI5P_M2 | 0.034       | 0.051                   | 0.040                                   | 0.040                                   | 0.040                                                                                        | 0.040                                                                                                                             |
| RI5P_M3 | 0.007       | 0.026                   | 0.001                                   |                                         |                                                                                              |                                                                                                                                   |
| RI5P_M4 | 0.005       | 0.010                   | 0.000                                   |                                         |                                                                                              |                                                                                                                                   |
| RI5P_M5 | 0.000       | 0.007                   | 0.000                                   |                                         |                                                                                              |                                                                                                                                   |
| R5P_M   | 0.113       | 0.013                   | 0.039                                   | 0.039                                   | 0.039                                                                                        | 0.037                                                                                                                             |
| R5P_M1  | 0.832       | 0.049                   | 0.920                                   | 0.921                                   | 0.921                                                                                        | 0.922                                                                                                                             |
| R5P_M2  | 0.032       | 0.045                   | 0.040                                   | 0.040                                   | 0.040                                                                                        | 0.040                                                                                                                             |
| R5P_M3  | 0.007       | 0.017                   | 0.001                                   |                                         |                                                                                              |                                                                                                                                   |
| R5P_M4  | 0.010       | 0.010                   | 0.000                                   |                                         |                                                                                              |                                                                                                                                   |
| R5P_M5  | 0.000       | 0.004                   | 0.000                                   |                                         |                                                                                              |                                                                                                                                   |
| F6P_M   | 0.080       | 0.013                   | 0.047                                   |                                         |                                                                                              |                                                                                                                                   |
| F6P_M1  | 0.336       | 0.007                   | 0.352                                   | 0.047                                   | 0.047                                                                                        | 0.046                                                                                                                             |
| F6P_M2  | 0.558       | 0.016                   | 0.575                                   | 0.352                                   | 0.352                                                                                        | 0.344                                                                                                                             |
| F6P_M3  | 0.007       | 0.016                   | 0.024                                   | 0.576                                   | 0.576                                                                                        | 0.585                                                                                                                             |
| F6P_M4  | 0.000       | 0.008                   | 0.000                                   |                                         |                                                                                              |                                                                                                                                   |
| F6P_M5  | 0.009       | 0.007                   | 0.000                                   |                                         |                                                                                              |                                                                                                                                   |
| F6P_M6  | 0.000       | 0.000                   | 0.000                                   |                                         |                                                                                              |                                                                                                                                   |
| S7P_M   | 0.085       | 0.014                   | 0.028                                   | 0.028                                   | 0.028                                                                                        | 0.027                                                                                                                             |
| S7P_M1  | 0.657       | 0.026                   | 0.669                                   | 0.669                                   | 0.668                                                                                        | 0.669                                                                                                                             |
| S7P_M2  | 0.234       | 0.028                   | 0.288                                   | 0.289                                   | 0.289                                                                                        | 0.290                                                                                                                             |
| S7P_M3  | 0.024       | 0.007                   | 0.014                                   | 0.014                                   | 0.014                                                                                        | 0.015                                                                                                                             |
| S7P_M4  | 0.000       | 0.007                   | 0.000                                   |                                         |                                                                                              |                                                                                                                                   |
| S7P_M5  | 0.000       | 0.002                   | 0.000                                   |                                         |                                                                                              |                                                                                                                                   |
| S7P_M6  | 0.000       | 0.001                   | 0.000                                   |                                         |                                                                                              |                                                                                                                                   |

|        |       |       |       |       |       |       |
|--------|-------|-------|-------|-------|-------|-------|
| S7P_M7 | 0.000 | 0.001 | 0.000 |       |       |       |
| G6P_M  | 0.030 | 0.012 | 0.022 | 0.022 | 0.022 | 0.022 |
| G6P_M1 | 0.176 | 0.007 | 0.175 | 0.175 | 0.175 | 0.172 |
| G6P_M2 | 0.778 | 0.009 | 0.769 | 0.769 | 0.769 | 0.772 |
| G6P_M3 | 0.016 | 0.028 | 0.033 |       |       |       |
| G6P_M4 | 0.000 | 0.028 | 0.001 |       |       |       |
| G6P_M5 | 0.000 | 0.028 | 0.000 |       |       |       |
| G6P_M6 | 0.000 | 0.028 | 0.000 |       |       |       |
